# Supplementary material for: Boron difluoride complexes of 3-hydroxyflavone derivatives: efficient bioinspired dyes for solution and solid-state emission
Source: Royal Society of Chemistry journal article supplement (doi:10.1039/c2pp25300c), 2012-11-12
Supplement: c2pp25300c.pdf [file c2pp25300c.pdf]

## Supplementary Information

### Boron difluoride complexes of 3-Hydroxyflavones : Efficient Bioinspired dyes emitting in the visible

Anthony D'Aléo, and Frédéric Fages

**Figure S1.** UV/visible electronic absorption (straight line) and luminescence (dashed line) in cyclohexane (black), dichloromethane (red) and acetonitrile (blue) for a/ **1-H**, b/ **2-H**, c/ **3-H**, d/ **4-H**, e/ **5-H** and f/ **6-H**.

**Figure S2.** UV/visible electronic absorption spectra of the free ligands (—) and their BF<sub>2</sub> complexes (—) in DCM. a/ **1**; b/ **2**; c/ **3**; d/ **4**; e/ **5** and f/ **6**.

**Figure S3.** UV/visible electronic absorption spectra and emission spectra of a/ **1-BF<sub>2</sub>**; b/ **2-BF<sub>2</sub>**; c/ **3-BF<sub>2</sub>**; d/ **4-BF<sub>2</sub>**; **5-BF<sub>2</sub>** and f/ **6-BF<sub>2</sub>** in CCl<sub>4</sub>, chloroform, dichloromethane and dichloroethane.

**Figure S4.** a/ Stokes shifts of **n-BF<sub>2</sub>** as a function of the Stokes shift of **2-BF<sub>2</sub>**; b/ Stokes shifts of **n-BF<sub>2</sub>** as a function of the Stokes shift of **4-BF<sub>2</sub>**.

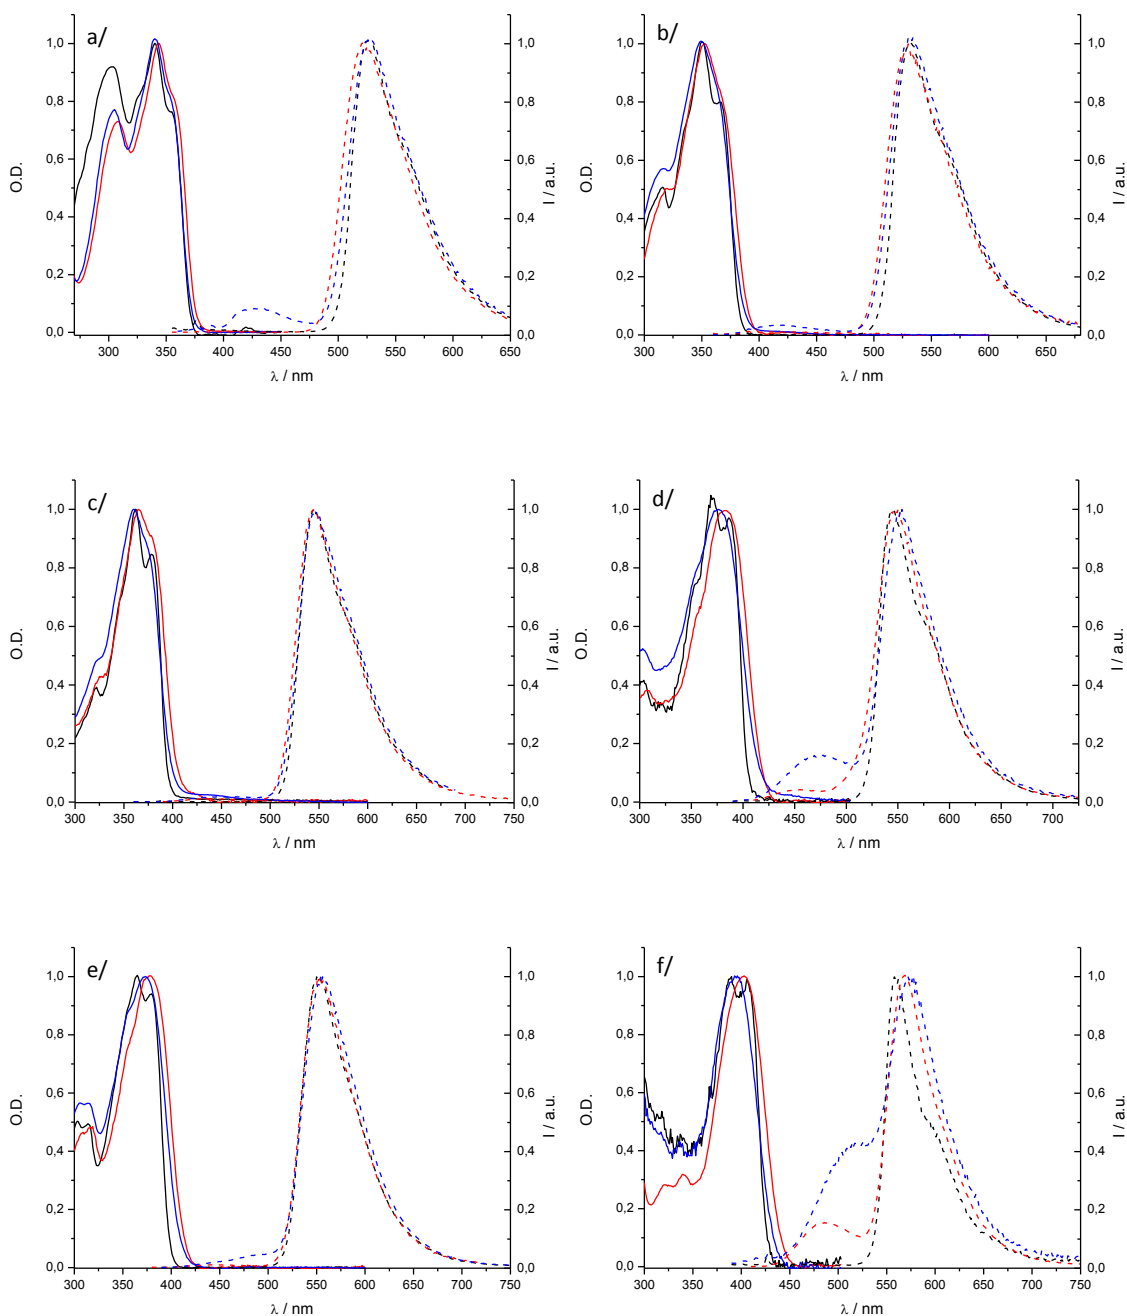

**Figure S1.** UV/visible electronic absorption (straight line) and luminescence (dashed line) in cyclohexane (black), dichloromethane (red) and acetonitrile (blue) for a/ **1-H**, b/ **2-H**, c/ **3-H**, d/ **4-H**, e/ **5-H** and f/ **6-H**.

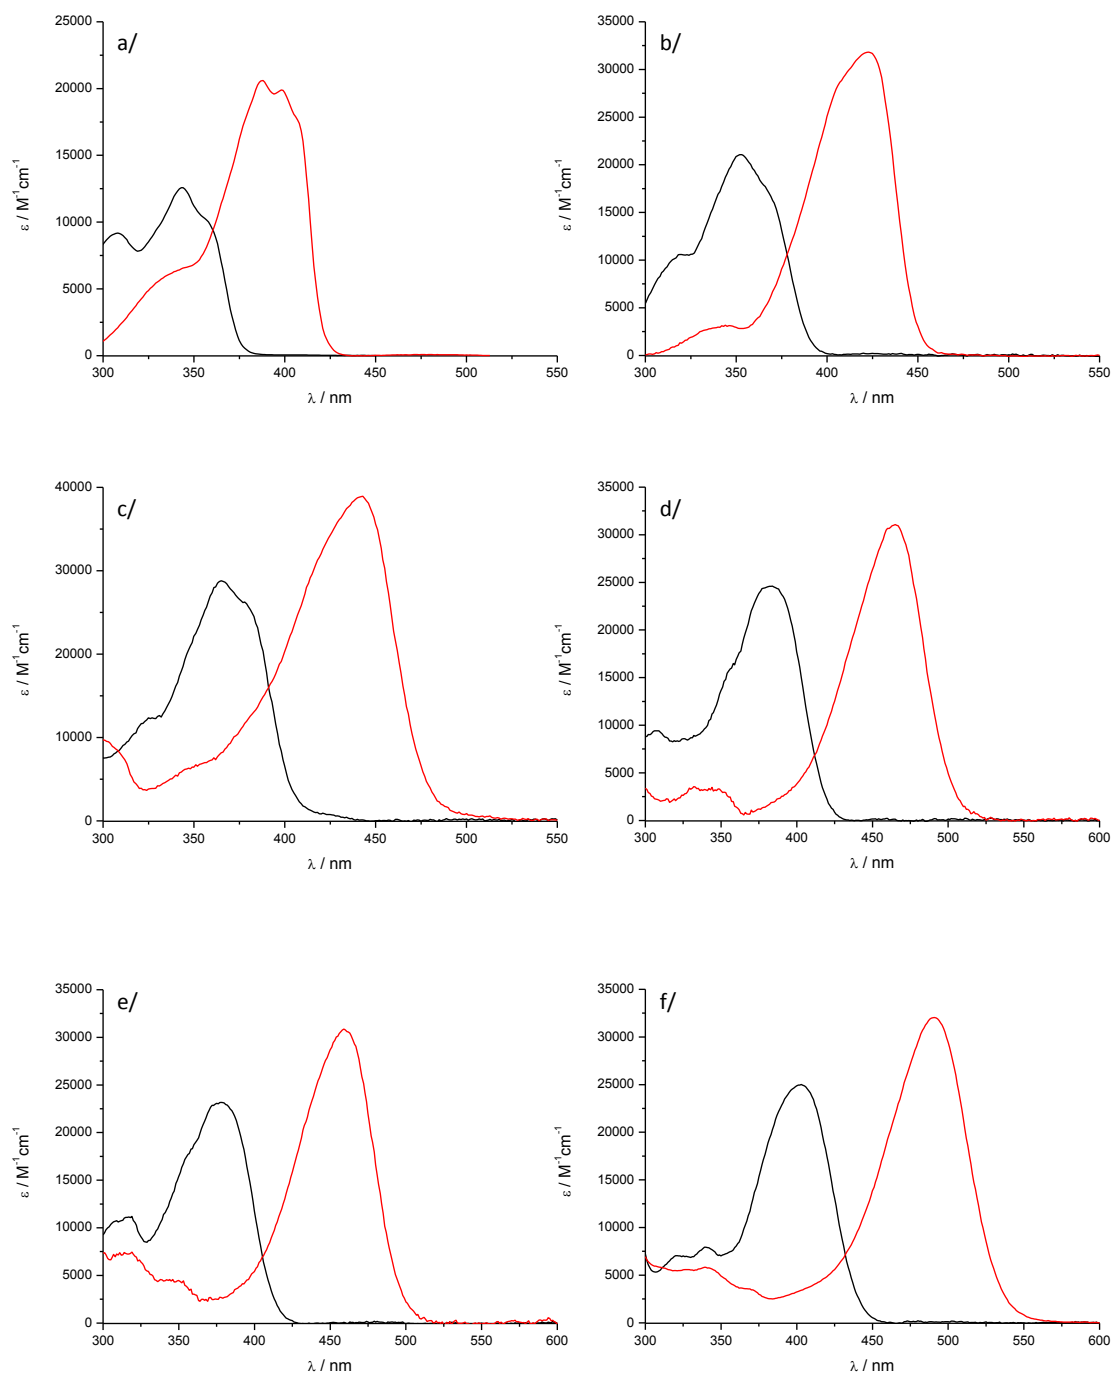

**Figure S2.** UV/visible electronic absorption spectra of the free ligands (—) and their BF<sub>2</sub> complexes (—) in DCM. a/ **1**; b/ **2**; c/ **3**; d/ **4**; e/ **5** and f/ **6**.

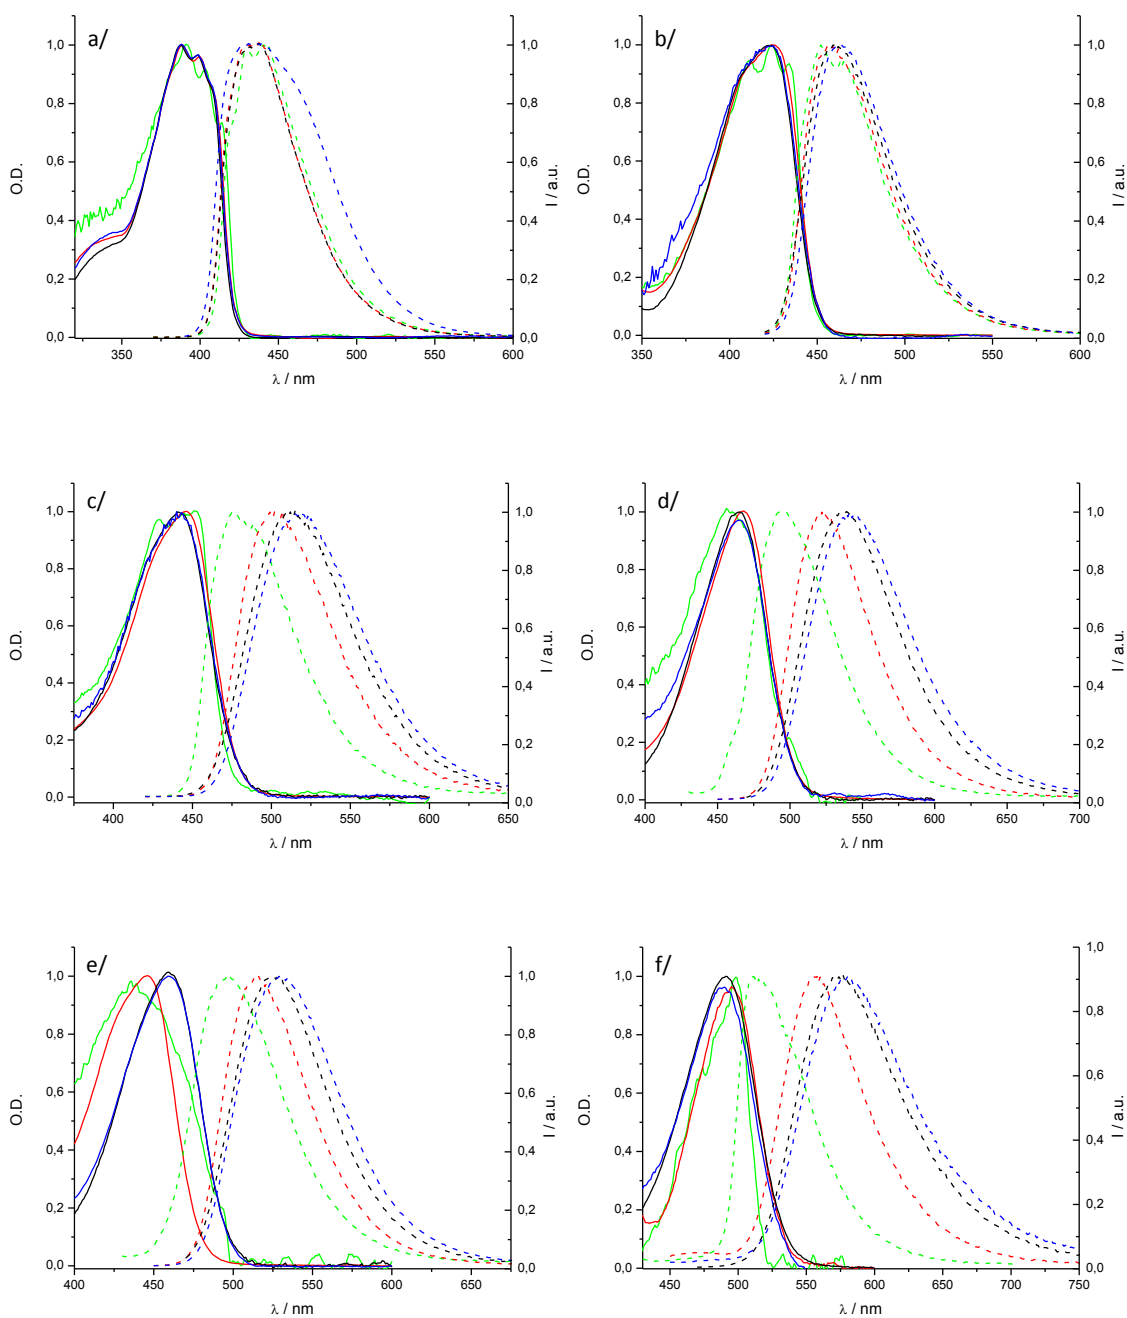

**Figure S3.** UV/visible electronic absorption spectra and emission spectra of a/ **1-BF<sub>2</sub>**; b/ **2-BF<sub>2</sub>**; c/ **3-BF<sub>2</sub>**; d/ **4-BF<sub>2</sub>**; **5-BF<sub>2</sub>** and f/ **6-BF<sub>2</sub>** in  $\text{CCl}_4$ , chloroform, dichloromethane and dichloroethane.

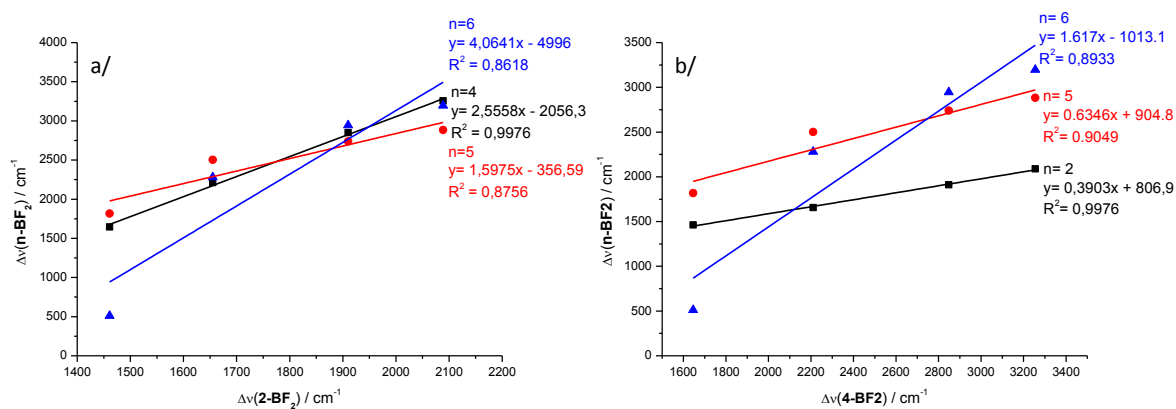

**Figure S4.** a/ Stokes shifts of  $n\text{-BF}_2$  as a function of the Stokes shift of  $2\text{-BF}_2$ ; b/ Stokes shifts of  $n\text{-BF}_2$  as a function of the Stokes shift of  $4\text{-BF}_2$ .
